## 30 **Abstract**

31

32 The motor system's ability to adapt to changes in the environment is essential for maintaining  
33 accurate movements. During such adaptation several distinct systems are recruited: cerebellar  
34 sensory-prediction error learning, success-based reinforcement, and explicit strategy-use. Although  
35 much work has focused on the relationship between cerebellar learning and strategy-use, there is little  
36 research regarding how reinforcement and strategy-use interact. To address this, participants first  
37 learnt a 20° visuomotor displacement. After reaching asymptotic performance, binary, hit-or-miss  
38 feedback (BF) was introduced either with or without visual feedback, the latter promoting  
39 reinforcement. Subsequently, retention was assessed using no-feedback trials, with half of the  
40 participants in each group being instructed to stop using any strategy. Although BF led to an increase  
41 in retention of the visuomotor displacement, instructing participants to remove their strategy nullified  
42 this effect, suggesting strategy-use is critical to BF-based reinforcement. In a second experiment, we  
43 prevented the expression or development of a strategy during BF performance, by either constraining  
44 participants to a short preparation time (expression) or by introducing the displacement gradually  
45 (development). As both strongly impaired BF performance, it suggests reinforcement requires both  
46 the development and expression of a strategy. These results emphasise a pivotal role of strategy-use  
47 during reinforcement-based motor learning.

48

## 49 **Introduction**

50

51 In a constantly changing environment, our ability to adjust motor commands in response to novel  
52 perturbations is a critical feature for maintaining accurate performance <sup>1</sup>. These adaptive processes  
53 have often been studied in the laboratory through the introduction of a visual displacement during  
54 reaching movements <sup>2</sup>. The observed visuomotor adaptation, characterized by a reduction in  
55 performance errors, was believed to be primarily driven by a cerebellar-dependent process that  
56 gradually reduces the mismatch between the predicted and actual sensory outcome (sensory prediction  
57 error) of the reaching movement <sup>1,3,4</sup>. Cerebellar adaptation is a stereotypical, slow and implicit  
58 process and therefore does not require the individual to be aware of the perturbation to take place <sup>5,6</sup>.  
59 However, a single-process framework cannot account for the great variety of results observed during  
60 visuomotor adaptation tasks <sup>7</sup>. Specifically, it has recently been shown that several other non-  
61 cerebellar learning mechanisms also play a pivotal role in shaping behaviour during adaptation  
62 paradigms such as explicit strategy-use <sup>8,9</sup> and reward-based reinforcement <sup>10-12</sup>.

63

64 Strategy-use usually consists of employing simple heuristics such as aiming off target in the direction  
65 opposite to a visual displacement, to quickly and accurately account for it <sup>5</sup>. However, this requires

66 explicit knowledge of the perturbation, which in turn usually requires experiencing large and  
67 unexpected errors<sup>8,13-15</sup>. Strategy-use contrasts with cerebellar adaptation in that it is idiosyncratic<sup>9</sup>,  
68 explicit, and can lead to fast adaptation rates<sup>16</sup>. Critically, cerebellar adaptation takes place regardless  
69 of the presence or absence of explicit strategies, even at the cost of accurate performance<sup>5</sup>.

70

71 More recently, another putative mechanism contributing to motor adaptation has been proposed,  
72 through which the memory of actions that led to successful outcomes (hitting the target) are  
73 strengthened, and therefore more likely to be re-expressed. Such reinforcement is considered to be an  
74 implicit process, but distinct from cerebellar adaptation in that it doesn't employ sensory information  
75 but task success or failure<sup>10,11</sup>. To examine this phenomenon, several studies employed a binary, hit-  
76 or-miss feedback (BF), paradigm which promotes reinforcement over cerebellar processes<sup>11,12,17</sup>. For  
77 example, in one study, participants receiving only binary feedback following successful adaptation  
78 expressed stronger retention than participants who had received a combination of visual and binary  
79 feedback<sup>12</sup>. The authors argued this could be due to greater involvement of reinforcement-based  
80 process that is less susceptible to forgetting<sup>12</sup>.

81

82 With the multiple processes framework of motor adaptation, the question of interaction between the  
83 distinct systems becomes central to understanding the problem as a whole, and it remains an under-  
84 investigated question for reward-based reinforcement. In decision-making literature, it has long been  
85 suggested that two distinct "model-based" and "model-free" systems interact<sup>18,19</sup> and even require  
86 communication to be optimal<sup>20,21</sup>. Interestingly, model-based processes share many characteristics  
87 with strategy-use during motor adaptation, in that they are both more explicit, rely on an internal  
88 model of the world (strategy-use<sup>22,23</sup>; model-based decision-making<sup>24</sup>), and are closely related to  
89 working memory capacity (strategy-use<sup>25,26</sup>; model-based decision-making<sup>27,28</sup>) and pre-frontal  
90 cortex processes (strategy-use<sup>25</sup>; model-based decision-making<sup>21,29</sup>). On the other hand, the concept  
91 of reinforcement in motor adaptation comes directly from the model-free systems described in  
92 decision-making literature<sup>23</sup>, and is often labelled as such. It is more implicit, relies on immediate  
93 action-reward contingencies and is thought to recruit the basal ganglia in both cases (visuomotor  
94 adaptation<sup>17</sup>; decision-making<sup>18</sup>). Despite these interesting similarities, unlike model-based and  
95 model-free decision-making, the relationship between strategy-use and reinforcement during  
96 visuomotor adaptation paradigms is currently unknown. Evidence of this relationship exists from a  
97 recent study which showed participants needed to experience a large reaching error in order to express  
98 a reinforcement-based memory<sup>15</sup>. As suggested before, strategy-use is an explicit process that  
99 requires experiencing large errors<sup>13,14,22</sup>. Thus, is it possible that the formation of a reinforcement-  
100 based memory requires, or at least benefits, from some form of strategy-use.

101

102 To address this, we first examined the contribution of strategy-use to the reinforcement-based  
103 improvements in retention following binary feedback<sup>12,17</sup>. Secondly, we used a forced reaction time  
104 (forced RT) paradigm<sup>30</sup> to investigate the importance of being able to express a strategy when  
105 encountering binary (reinforcement-based) feedback.

106

## 107 **Results**

108

### 109 **Experiment 1: strategic re-aiming occurs during reinforcement-based retention.**

110 We first sought to investigate the role of strategy-use in the retention of a reinforced visual  
111 displacement memory. In experiment 1, participants made fast ‘shooting’ movements towards a single  
112 target (figure 1a). After a baseline block involving veridical vision (60 trials) and an adaptation block  
113 (75 trials) where a 20° counter-clockwise (CCW) visuomotor displacement was learnt with online  
114 visual feedback (VF), participants experienced the same displacement for 2 blocks (asymptote blocks;  
115 100 trials each) with either only binary feedback (BF group, figure 1b, top) to promote reinforcement,  
116 or BF and VF together (VF group, figure 1b, bottom). Following this, retention was assessed through  
117 2 no-feedback blocks (100 trials each), during which both BF and VF were removed. Before these no-  
118 feedback blocks, half of the participants were told to “carry on” as they were (“Maintain” group) and  
119 the remaining ones were informed of the nature of the perturbation, and to stop using any strategy to  
120 account for it (“Remove” group). Thus, there were four groups: BF-Maintain, BF-Remove, VF-  
121 Maintain and VF-Remove (N=20 for each group).

122

123

124

125

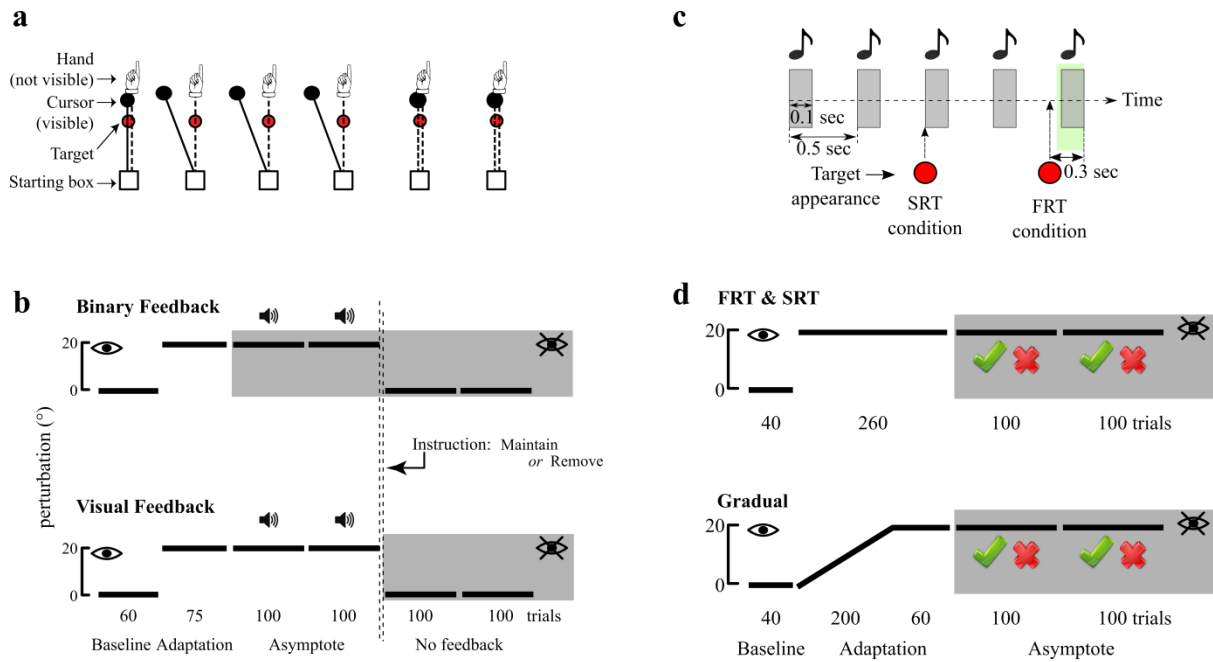

126

127

128 **Figure 1: Experimental design.** (a) Experiment 1: feedback-instruction. Screen display and hand-  
 129 cursor coupling across each block of the task. (b) Feedback-instruction task perturbation and feedback  
 130 schedule for the BF groups (top) and VF groups (bottom). The white and grey areas represent blocks  
 131 where VF was available or not available, respectively, as indicated with a crossed or non-crossed eye.  
 132 Blocks in which hits (with 5° tolerance on each side of the target) were followed by a pleasant sound  
 133 are indicated with a small speaker symbol. The y-axis represents the value of the discrepancy between  
 134 hand movement and task feedback. The double dashed vertical lines represents the time point at  
 135 which “Maintain” or “Remove” instructions were given. The number of trials and names for each  
 136 block are indicated at the bottom of each schedule. (c) Experiment 2: forced RT. Schedule of tone  
 137 playback and target appearance before each trial during the forced RT task (SRT and FRT conditions).  
 138 Participants were trained to initiate their reaching movements on the last of a series of five 100 ms-  
 139 long tones played at 0.5 sec intervals. The green area represents the allowed movement initiation  
 140 timeframe, and the red dots represent target onset times for each condition. The grey areas represent  
 141 the tones. (d) Forced RT task perturbation and feedback schedule for the SRT and FRT groups (top)  
 142 and for the Gradual group (bottom). Grey areas represent blocks without VF. The green tick and the  
 143 red cross represent binary feedback cues for a hit (5° tolerance on each side of the target) and miss,  
 144 respectively. The white and grey areas represent blocks in which VF was available or not available,  
 145 respectively, as indicated with a crossed or non-crossed eye, and the y-axis represents the value of the  
 146 discrepancy between hand movement and task feedback. The number of trials and names for each  
 147 block are indicated at the bottom of each schedule. BF: binary feedback; VF: visual feedback; RT:  
 148 reaction time; SRT: slow reaction time; FRT: fast reaction time.

149

150

151

152 Group performance is shown in figure 2a. All groups showed similar baseline performance (figure 2b;  
 153  $H(3)=4.59$   $p=0.20$ ; see Methods for detailed information on statistical analysis), and had fully adapted  
 154 to the visuomotor displacement prior to the asymptote/reinforcement blocks (average reach angle in  
 155 the last 20 trials of adaptation, figure 2c;  $H(3)=2.56$   $p=0.46$ ). Interestingly, at the start of the first  
 156 asymptote block, participants in both BF groups showed a dip in performance, effectively drifting  
 157 back toward baseline before adjusting back and returning to plateau performance. This “dip effect”

158 was completely absent in the VF groups. Therefore, success rate was compared independently across  
159 groups in the first 30 trials (figure 2d) and the remaining 170 trials (figure 2e) of the asymptote block.  
160 Both BF groups exhibited lower success rates than the VF groups in the early asymptote phase  
161 ( $H(3)=46.79$ ,  $p<0.001$ , Tukey's test  $p<0.001$  for BF-Maintain vs VF-Maintain and vs VF-Remove,  
162 and for BF-Remove vs VF-Maintain and vs VF-Remove). This was also seen in the late asymptote  
163 phase ( $H(3)=31.29$ ,  $p<0.001$ , Tukey's test  $p<0.001$  for BF-Maintain vs VF-Maintain and vs VF-  
164 Remove, and for BF-Remove vs VF-Maintain and vs VF-Remove), although performance greatly  
165 improved for both BF groups compared to the early phase ( $Z=3.692$  and  $Z=-3.81$  for BF-Remove and  
166 BF-Maintain, respectively,  $p<0.001$  for both). This dip in performance has previously been observed  
167 independently of our study when switching to BF after a displacement is abruptly introduced<sup>12</sup>.  
168 Finally, no across-group difference in RTs or movement duration was found during the asymptote  
169 blocks (Supplementary figure S1b, c).

170

171 Participants then performed a series of 2 no-feedback blocks. Similar to Shmuelof et al.,<sup>12</sup> we  
172 assessed retention by looking at the last 20 trials of the second block. However, our results are  
173 fundamentally the same irrespective of the trials used to represent retention. Overall, the BF-Maintain  
174 group showed greater retention relative to all other groups, largely maintaining the reach angle values  
175 achieved during the asymptote phase, whereas there was no difference between the other groups  
176 (figure 2f;  $H(3)=27.66$ ,  $p<0.001$ , Tukey's test  $p=0.001$  for BF-Remove vs BF-Maintain and  $p<0.001$   
177 for BF-Maintain vs both VF groups;  $p=0.6$  for BF-Remove vs VF-Remove;  $p=1$  for BF-Remove vs  
178 VF-Maintain;  $p=0.68$  for VF-Maintain vs VF-Remove). We therefore replicated previous work which  
179 showed that BF led to enhanced retention of a visual displacement when compared to VF<sup>12</sup>. However,  
180 this effect of BF was abolished by asking participants to remove any strategy they had developed (BF-  
181 remove). This suggests the increase in retention following BF was mainly a consequence of the  
182 greater development and expression of a strategy.

183

184

185

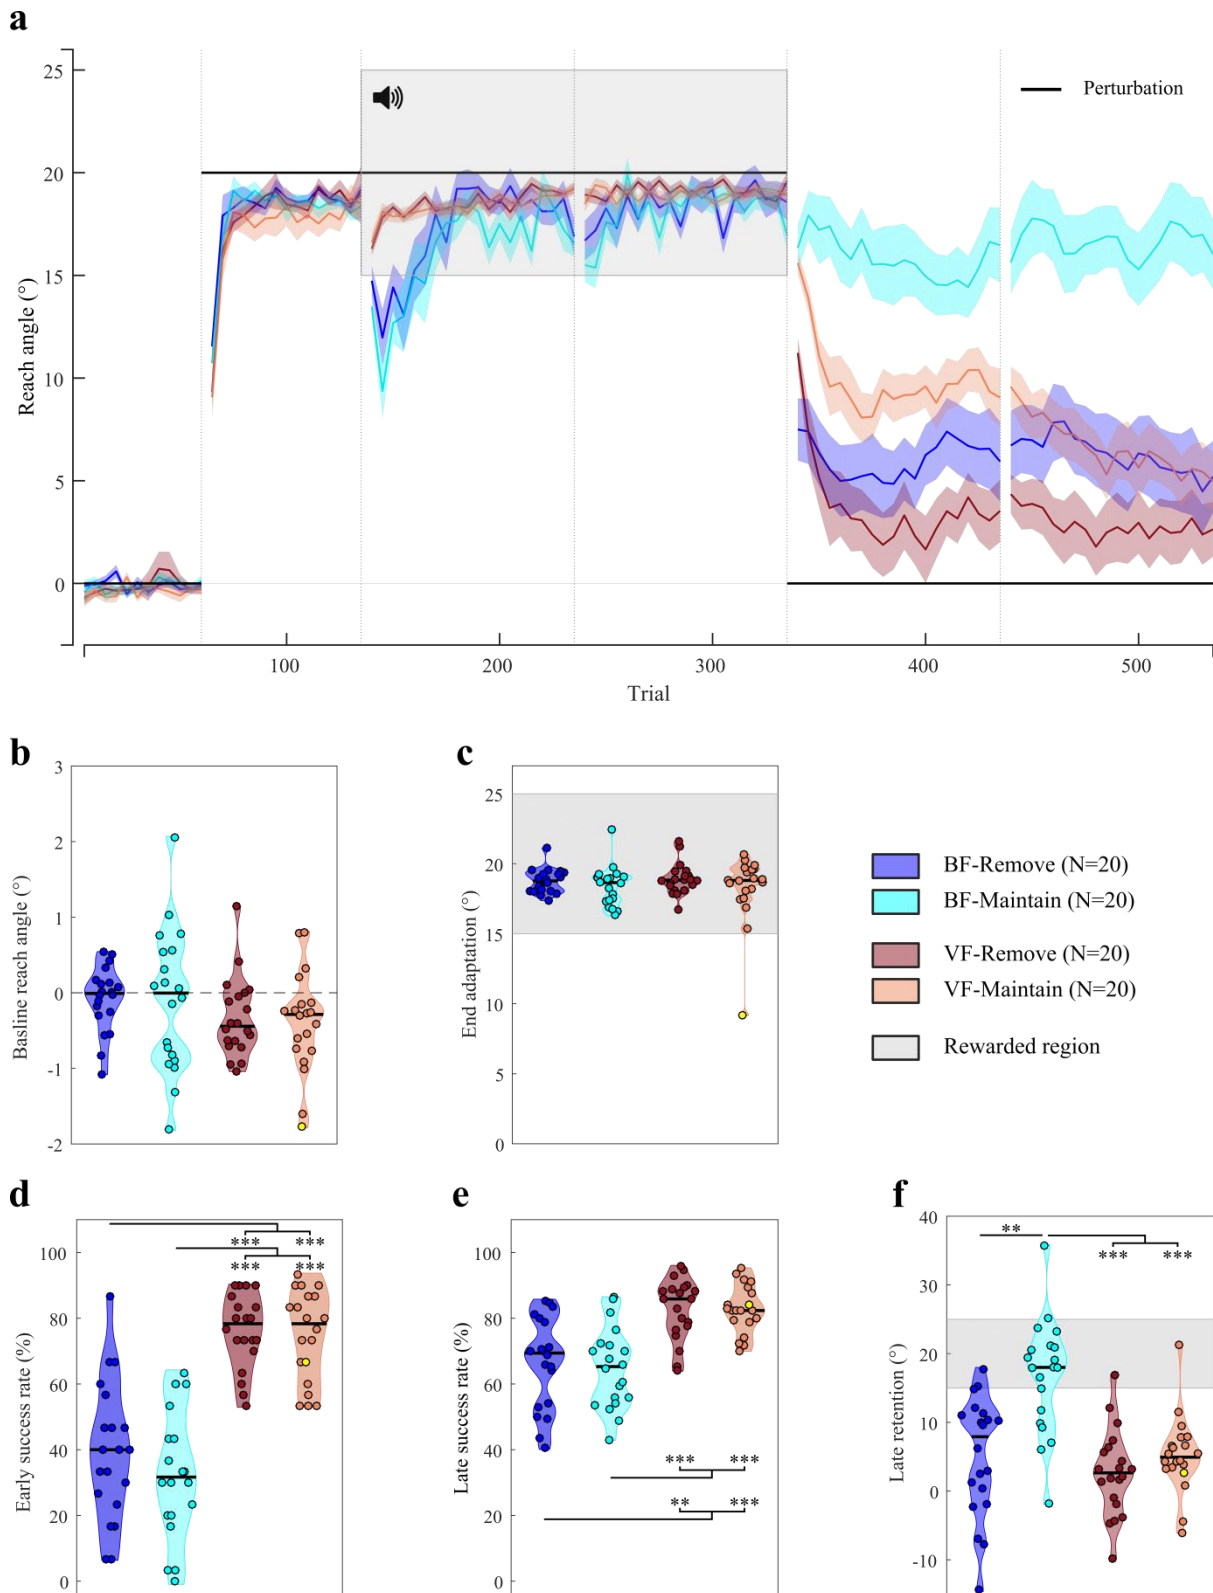

186

187 **Figure 2. Experiment 1: feedback-instruction.** (a) Reach angles with respect to target (°) of each  
 188 group during the visuomotor displacement task. Values are averaged across epochs of 5 trials.  
 189 Vertical bars represent block limits. The binary feedback consisted of a pleasant sound in the  
 190 rewarded region. The black solid line represents the hand-to-cursor discrepancy (the perturbation) for  
 191 all groups across the task. Coloured lines represent group mean and shaded areas represent s.e.m. (b)  
 192 Average reach angle of participants during baseline. (c) Average reach angle during the last 20 trials  
 193 of the adaptation phase. The shaded area represents the region to be rewarded in the subsequent

194 asymptote phase. **(d)** Success rate (%) during the first 30 trials of the asymptote phase. **(e)** Success  
195 rate during the remainder of the asymptote phase (i.e. trial 31 to 200 of asymptote blocks). **(f)**  
196 Average reach angle during the last 20 trials of the no-feedback (retention) phase. Each dot represents  
197 one participant. The yellow dot represents the same participant across all plots, who expressed  
198 atypical end adaptation reach angle values; however this was not seen across the other variables. For  
199 the distribution plots, horizontal black lines are group medians and the shaded areas indicate  
200 distribution of individual values. BF: binary feedback; VF: visual feedback. \*\*\*  $p < 0.001$ , \*\*  $p < 0.01$ .  
201

## 202 **Experiment 2: re-aiming is necessary for maintaining performance under binary feedback.**

203 If this conclusion from our first experiment is correct, then successful asymptote performance under  
204 BF only should be dependent on the ability to develop and express a strategy. Therefore, in  
205 experiment 2 we restricted participant's capacity to use a strategy by using a forced RT adaptation  
206 paradigm<sup>30-32</sup> (figure 1c). Specifically, two groups adapted to a 20° CCW visuomotor displacement  
207 by performing reaching movements to 4 targets (figure 1d), with the amount of available preparation  
208 time (i.e. time between target appearance and movement onset) being restricted. A first group was  
209 allowed to express slow RTs (SRT; RT constraints were 870 to 1000 ms after target onset; N=10),  
210 while the second group was only allowed very fast RTs (FRT; 130 to 300 ms; N=10; figure 1c and  
211 Supplementary figure S2a). The latter condition has been shown to prevent time-demanding strategy  
212 use such as mental rotations necessary to express re-aiming in reaching tasks<sup>30,32,33</sup>. Critically, this  
213 paradigm only prevented expression of re-aiming, but not strategy development. Therefore, to ensure  
214 any between-group difference was task-dependent and not related to inter-individual differences in  
215 awareness or understanding of the task, we explained in detail the nature of the perturbation and the  
216 optimal strategy to counter it. In addition, a third condition was designed in which participants were  
217 kept unaware of the visual displacement by introducing the perturbation gradually<sup>13,15</sup> (N=10; figure  
218 1d, bottom), and were not informed of any optimal strategy to employ. Participants in this group were  
219 given no RT constraint whatsoever. Finally, it should be mentioned that a large portion of participants  
220 in the Gradual group reported noticing a slight perturbation by the end of the adaptation block when  
221 informally asked after the experiment. However, they underestimated its amplitude significantly at  
222 best, reporting effects of the order of 5°. Nevertheless, for the sake of simplicity we will qualify this  
223 group as “unaware”, although we hereby acknowledge they reported very partial, reduced awareness  
224 of the perturbation.

225  
226 During baseline, average reach direction was similar for all groups (figure 3b;  $H(2)=0.45$ ,  $p=0.79$ ). To  
227 examine whether the FRT and SRT groups displayed different rates of learning during adaptation, we  
228 applied an exponential model to each participant's adaptation data. Note, this was not done for the  
229 gradual group whose adaptation rate was restricted by the incremental visuomotor displacement.  
230 Surprisingly, we found no significant difference between the FRT and SRT group's learning rates  
231 ( $U=74$ ;  $p=0.34$ ; Supplementary figure S2b). Indeed, one would expect the SRT group to express faster  
232 learning since they can express strategies to account for the perturbation<sup>16,30,32,34</sup>. This is most likely a



233 consequence of the small size of the perturbation encountered (i.e. 20°), which leaves less margin for  
234 strategic re-aiming<sup>34–36</sup>. At the end of the adaptation block, all groups adapted successfully, with no  
235 significant difference in reaching direction (figure 3c;  $H(2)=2.34$ ,  $p=0.31$ ). However, despite the lack  
236 of statistical significance, the mean reach direction for the FRT group was slightly under 15° (mean:  
237 14.87°), which represents the limit of the reward region in the subsequent block. We discuss the  
238 implications of this later.  
239  
240

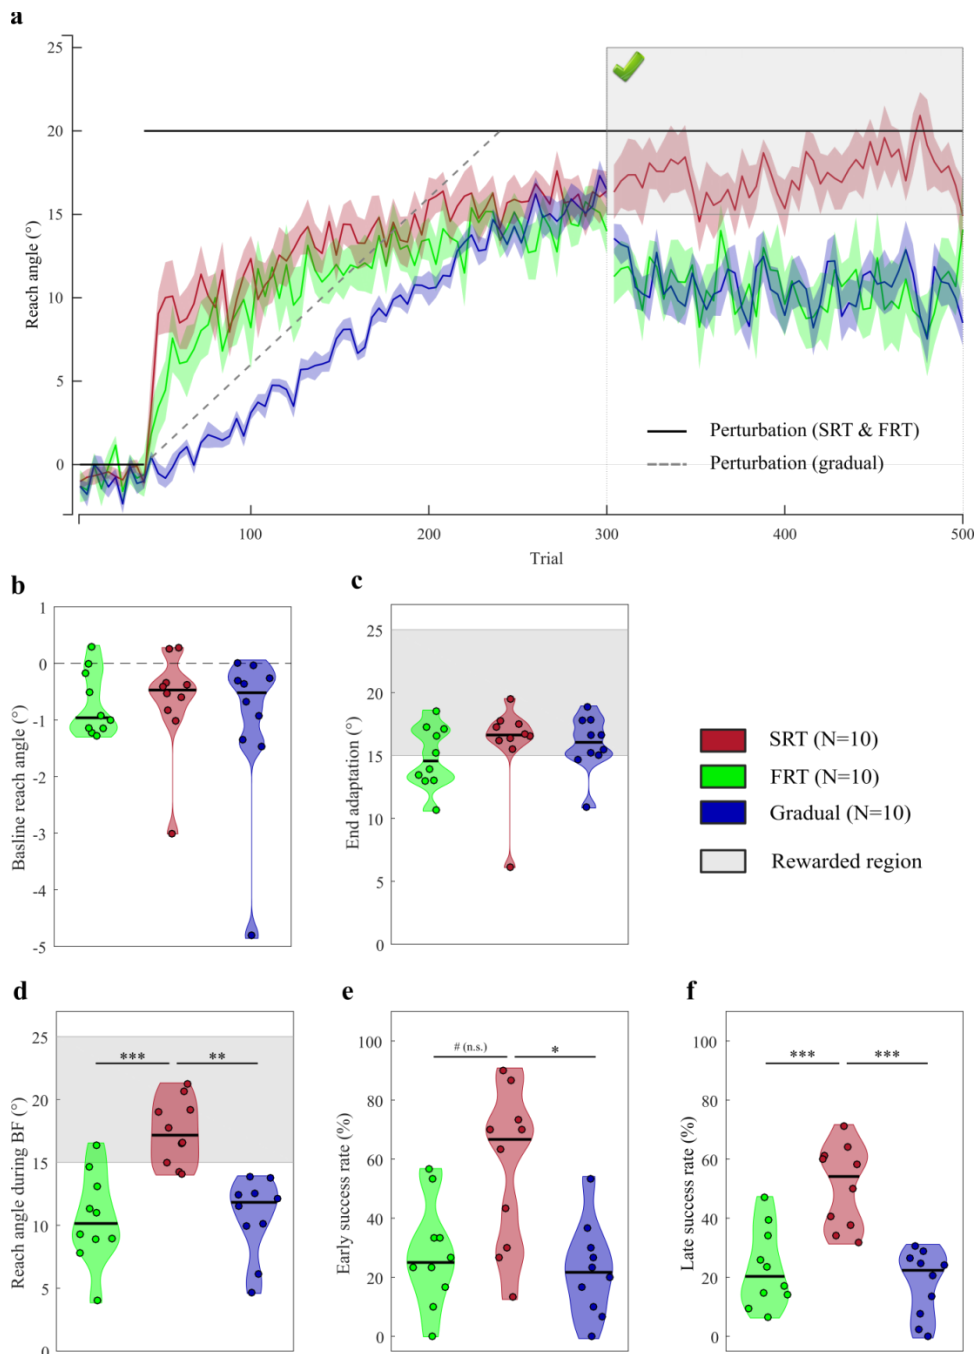

241

242 **Figure 3. Experiment 2: forced RT. (a)** Reach angles with respect to target (°) of each group during  
243 the visuomotor displacement task. Values are averaged across epochs of 4 trials. Vertical bars

244 represent block limits. The binary feedback consisted of a large green tick displayed on top of the  
245 screen if participants were within the reward region (see figure), and of a red cross if they were not  
246 (not shown). The black solid line represents the hand-to-cursor discrepancy (the perturbation) for the  
247 SRT and FRT group across the task, and the grey dashed line represents the perturbation for the  
248 Gradual group only. Coloured lines represent group mean and shaded areas represent s.e.m. **(b)**  
249 Average reach angle of participants during baseline. **(c)** Average reach angle during the last 20 trials  
250 of the adaptation phase. The shaded grey area represents the region to be rewarded in the subsequent  
251 asymptote phase. **(d)** Average reach angle during the binary feedback (BF) block. The shaded grey  
252 area represents the rewarded region. **(e)** Success rate during the first 30 trials of the asymptote phase.  
253 **(f)** Success rate during the remainder of the asymptote phase (i.e. trial 31 to 200 of asymptote blocks).  
254 Each dot represents one participant. For the distribution plots, horizontal black lines are group  
255 medians and the shaded areas indicate distribution of individual values. SRT: short reaction time;  
256 FRT: fast reaction time. #  $p=0.059$ ; \*\*\*  $p<0.001$ ; \*\*  $p<0.01$ ; \*  $p<0.05$ .

257

258 During asymptotic performance, where participants were restricted to binary feedback, the SRT group  
259 showed a striking ability to maintain performance within the rewarded region whereas the two other  
260 groups clearly could not (figure 3d;  $H(2)=17.5$ ,  $p<0.001$ , Bonferroni-corrected (see Methods),  
261 Tukey's test  $p<0.001$  vs FRT and  $p=0.001$  vs Gradual). Next we compared success rates across  
262 groups for early BF trials (i.e. first 30 trials; figure 3e) and the remainder of BF trials (figure 3f)  
263 independently. Early success rates were significantly lower for the Gradual group compared to the  
264 SRT ( $H(2)=9.2$ ,  $p=0.02$ , Bonferroni-corrected, Tukey's test  $p=0.011$ ), and a similar but non-  
265 significant trend was observed between the FRT and SRT groups (Tukey's test  $p=0.059$ ). The absence  
266 of a significant difference in early success rate between the FRT and SRT groups cannot be explained  
267 by average reach angles, as the FRT group actually express a larger decrease in reach angle during  
268 that timeframe compared to the Gradual group (figure 3a). Rather, the greater variability in reach  
269 angle within individuals in the FRT as opposed to the Gradual group is likely to cause this result  
270 (average individual variance; FRT: 47.5; Gradual: 18.9). However, success rate during the remaining  
271 trials reached significance for both the FRT and Gradual groups compared to the SRT group  
272 ( $H(2)=16.67$ ,  $p<0.001$ , Bonferroni-corrected, Tukey's test  $p<0.001$  for both FRT and Gradual).  
273 Surprisingly, no dip in performance was observed for the SRT group in the early phase of the BF  
274 blocks, suggesting that informing participants of the perturbation and how to overcome it at the  
275 beginning of the experiment is sufficient to prevent this drop in reach angle.

276

277 Next, to ensure the low end adaptation reach angles expressed by the FRT group did not explain the  
278 low success rates, we removed every participant who expressed less than  $15^\circ$  reach angle at the end of  
279 the adaptation from each group (e.g. <sup>37</sup>). Henceforth, we refer to those participants as non-adapters, as  
280 opposed to adapters. This procedure resulted in 1, 5 and 2 participants being removed in the SRT,  
281 FRT and Gradual groups, respectively. Performance for the adapters was fundamentally the same as  
282 the original groups (figure 4a), except for end adaptation reach angles, which were now all above  $15^\circ$   
283 (figure 4b; SRT  $17.0 \pm 1.2$ ; FRT  $16.9 \pm 1.2$ ; Gradual  $16.7 \pm 1.4$ ). Specifically, the SRT-adapter group  
284 still showed a clear ability to remain in the rewarded region during binary feedback performance

285 (asymptotic blocks), whereas the other two adapter groups could not (figure 4c;  $H(2)=14.0$ ,  $p=0.002$ ,  
 286 Bonferroni-corrected, Tukey's test  $p=0.028$  vs FRT-adapter and  $p=0.001$  vs Gradual-adapter).  
 287 Because the full groups (i.e. non-Adapters included) did not express a drop in success rate during  
 288 early asymptote trials, we compared Adapters' success rates during asymptote as a whole, rather than  
 289 splitting them between early and late performance. The SRT-adapter group still displayed greater  
 290 success than the Gradual-adapter group (figure 4d;  $H(2)=13.74$ ,  $p=0.002$ , Bonferroni-corrected,  
 291 Tukey's test  $p<0.001$ ). However, the difference between the SRT-adapter and the FRT-adapter group  
 292 was now non-significant (Tukey's test  $p=0.12$ ). Despite this, the reach angle differences clearly show  
 293 that successful binary performance remained strongly affected by one's capacity to develop and  
 294 express a strategy even for the successful adapters, as shown by the Gradual-adapter and FRT-adapter  
 295 groups, respectively (figure 4a).

296

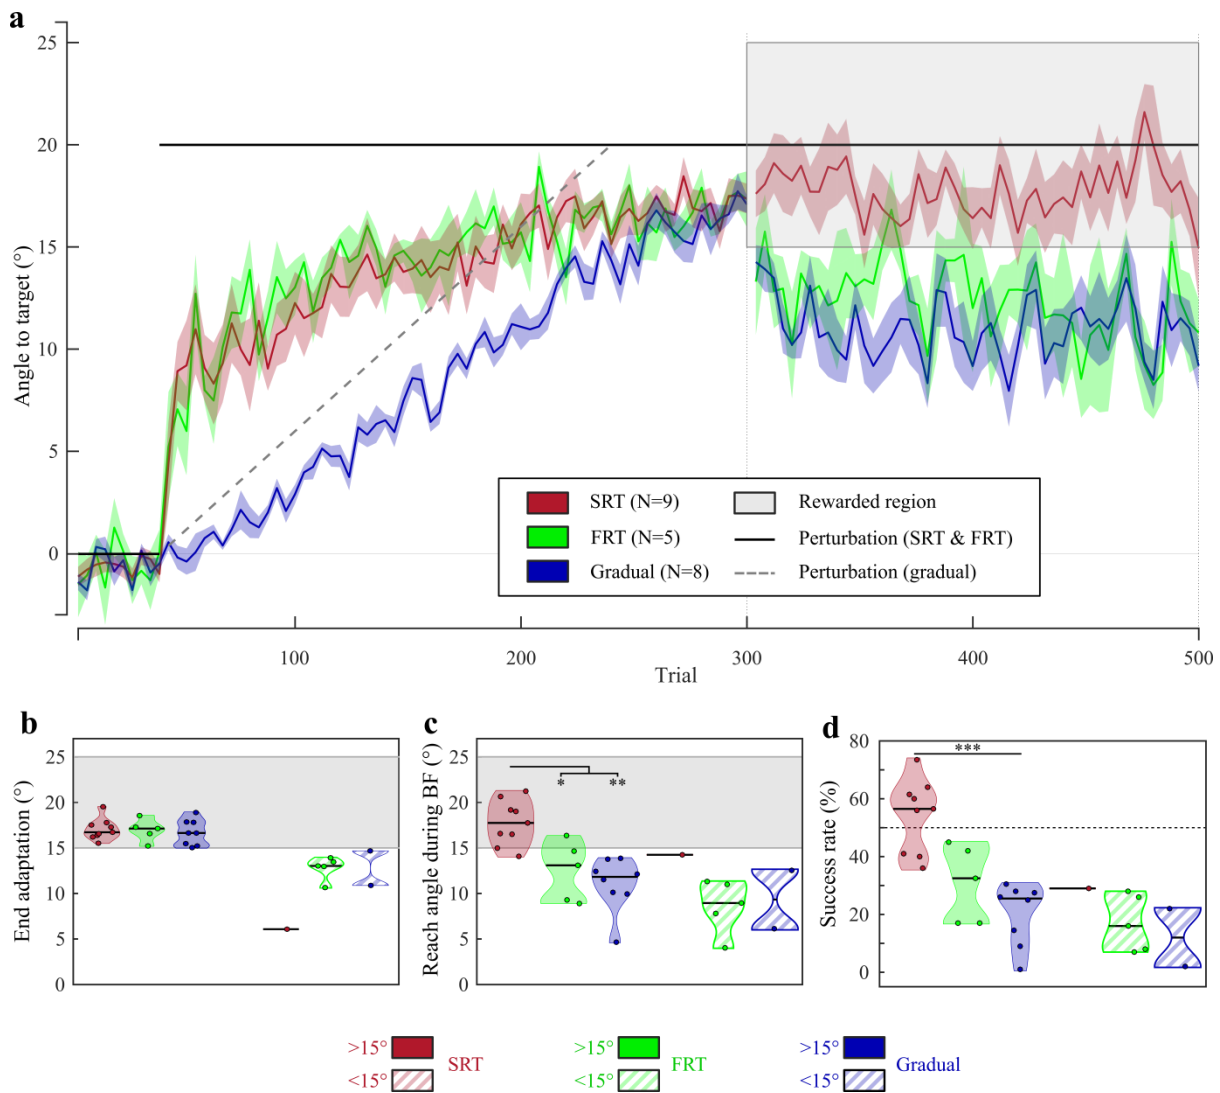

297

298

299 **Figure 4. Performance of successful adapters during the forced RT task. (a)** Reach angles with  
 300 respect to target (°) of each group's successful adapters exclusively. Values are averaged across  
 301 epochs of 4 trials. Vertical bars represent block limits. The binary feedback consisted of a large green

302 tick displayed on top of the screen if participants were within the reward region (see figure), and of a  
303 red cross if they were not (not shown). The black solid line represents the hand-to-cursor discrepancy  
304 (the perturbation) for the SRT and FRT group across the task, and the grey dashed line represents the  
305 perturbation for the Gradual group only. Coloured lines represent group mean and shaded areas  
306 represent s.e.m. **(b)** Average reach angle during the last 20 trials of the adaptation phase. The shaded  
307 area represents the region to be rewarded in the subsequent asymptote phase. **(c)** Average reach angle  
308 during the binary feedback (BF) block. **(d)** Success rate during the asymptote phase. The black dashed  
309 line represents 50% success rate. Each dot represents one participant. For the distribution plots,  
310 horizontal black lines are group medians and the shaded areas indicate distribution of individual  
311 values.  $>15^\circ$  and  $<15^\circ$  indicate the average reach angle during the end of the adaptation phase (i.e.  
312 adapter and non-adapter, respectively). SRT: short reaction time; FRT: fast reaction time. \*\*\*  
313  $p<0.001$ ; \*\*  $p<0.01$ ; \*  $p<0.05$ .

314

315 Finally, since trials were reinitialised if participants failed to initiate reaching movements within the  
316 allowed timeframe, we compared the average occurrence of these failed trials between the FRT and  
317 SRT groups (Supplementary figure S2c) to ensure any between-group difference cannot be explained  
318 by this. Both groups expressed similar amounts of failed attempts per trial ( $U=100$ ,  $p=0.73$ ). In  
319 addition, movement times were significantly faster across all blocks for the FRT group compared to  
320 the SRT group (Supplementary figure S2d;  $H(2)=11.78$ ,  $p=0.005$ , Tukey's test  $p=0.002$ ), although  
321 they remained strictly under 400 ms for all groups as in the first experiment (figure 1c). RTs  
322 expressed by the Gradual group were between the SRT and FRT constraints (Supplementary figure  
323 S2a; Gradual group RT range 385 to 1610 ms).

324

325 Overall these findings demonstrate that preventing strategy use by restricting its expression or making  
326 participants unaware of the nature of the task results in the partial incapacity of participants to  
327 perform successfully during binary feedback performance. It should be noted, however, that  
328 performance does not reduce back to baseline entirely, as participants in both the FRT and Gradual  
329 groups are still able to express intermediate reach angle values of the order of 10 to  $15^\circ$ .

330

## 331 **Discussion**

332

333 Previous work has led to the idea that BF induces recruitment of a model-free reinforcement system  
334 that strengthens and consolidates the acquired memory of a visuomotor displacement<sup>10,12,17</sup>. Here, we  
335 investigated the role of explicit strategy-use in the context of BF, and our results suggest that it may  
336 have a more central role in explaining general BF-induced behaviours than previously expected. In the  
337 first experiment, the increased retention observed in the BF-Maintain group was suppressed if  
338 participants were told to “remove their strategy” (BF-Remove group). In the second experiment,  
339 preventing strategy-use by using a secondary task or preventing development of a strategy with a  
340 gradual introduction of the perturbation resulted in participants being unable to maintain accurate

341 performance during BF blocks, suggesting that strategy-use is necessary for performing a BF reaching  
342 task.

343

344 The initial performance drop observed at the introduction of BF for both BF groups suggests that  
345 participants cannot immediately account for a visuomotor displacement they have already  
346 successfully adapted to<sup>12</sup>. A possible explanation is that the cerebellar memory is not available  
347 anymore, most likely because removing VF results in a context change, which is known to prevent  
348 retrieval and expression of an otherwise available memory<sup>38-40</sup>. Considering this, the restoration of  
349 performance observed after this dip could not be explained by recollection of the cerebellar memory,  
350 suggesting another mechanism took place. Two possible candidates to explain this drift back are  
351 model-free reinforcement<sup>10-12,17</sup> and strategy-use<sup>7,8,35</sup>.

352

353 Reinforcement learning is usually considered to operate through experiencing success<sup>10,11</sup>. It is thus  
354 difficult to argue for a reinforcement-based reversion to good performance during BF because  
355 participants in the trough of the dip do not experience a large amount of success, if any. Furthermore,  
356 participants experienced little “plateau” performance during the previous block, making formation of  
357 a model-free reinforcement memory unlikely, because it is considered a rather slow learning process  
358 as opposed to model-based reinforcement<sup>10,41</sup>. On the other hand, both BF groups experienced a large  
359 amount of unexpected errors during this drop, which may promote a more strategy-based approach<sup>13-</sup>  
360<sup>15,22</sup>. In line with this, the SRT group in the forced RT task, which has been informed of the  
361 displacement and of the right strategy to counter it, does not express such dip when starting the BF  
362 block.

363

364 The forced RT task addresses this question more directly, and shows that impeding strategy-use with  
365 a secondary task<sup>30,32</sup> prevents participants from restoring performance over BF blocks, confirming  
366 our interpretation. Interestingly, both the FRT and Gradual groups do not show a return to baseline  
367 during asymptote. Likely, the FRT group is aware of the optimal strategy, and can partially express it,  
368 leading to these intermediate reach angles. Indeed, previous work on forced RT paradigms shows that  
369 adapting the constraints based on each individual’s baseline proficiency at this task more efficiently  
370 prevents strategy-use<sup>32</sup>. On the other hand, the Gradual group was not informed of the optimal  
371 strategy, and thus would be expected to reach back to baseline.. However, even in the presence of BF,  
372 the Gradual group shows a striking inability to find the optimal strategy, suggesting the lack of  
373 structural understanding of the task strongly impedes their exploration. This overall incapacity of the  
374 Gradual group to express an efficient explorative strategy is consistent with previous findings  
375 showing that rewarding success alone without providing any explanation of the task structure is not  
376 sufficient to make participants reliably learn an optimal strategy<sup>42</sup>.

377

378 Previous studies employing the forced RT paradigm have shown it usually leads to slower learning  
379 rates during adaptation because participants can less easily apply a strategy from the beginning<sup>16,30,32</sup>.  
380 In contrast, no such difference in learning rate was observed in our forced RT groups. This is possibly  
381 due to the difference in size of the perturbation between our study (20°) compared to others<sup>30,32</sup> (30°),  
382 making the explicit contribution potentially smaller during the adaptation phase<sup>7</sup>.

383  
384 Our findings qualitatively replicate results from a previous study employing a similar design<sup>12</sup>.  
385 However, it should be noted that our paradigm differs in several ways. First, retention was assessed  
386 using feedback removal rather than visual error clamps, although there is evidence that both methods  
387 lead to quantitatively similar results<sup>43</sup>. Second, our displacement was only 20° of amplitude and no  
388 additional displacement was introduced after the asymptote blocks. There is now a growing wealth of  
389 evidence that the cerebellum cannot account for more than 15 to 20° displacements<sup>32,36,44</sup>, with the  
390 remaining discrepancy usually being accounted for through strategic re-aiming<sup>35</sup>. Therefore, the  
391 absence of a second, larger displacement, if anything, should only result in a less strategy-based  
392 performance. Nevertheless, instructing participants to remove any strategy (Remove groups) resulted  
393 in a near-complete nullification of the binary feedback effect, suggesting it is mainly underlain by a  
394 simple re-aiming process. However, the Maintain instruction alone was not sufficient to produce this  
395 high retention profile, as the VF-Maintain group did not express it. We believe this can be explained  
396 in two ways. First, experiencing no feedback may result in a stronger context change for the VF  
397 groups compared to the BF groups, because the latter ones experienced the absence of VF during the  
398 asymptote blocks beforehand. Thus, this should lead to a stronger drop in reaching angle at the  
399 beginning of the no feedback trials for the VF groups, as observed here. Alternatively, the VF-  
400 Maintain group experienced 200 more trials with visual feedback at asymptote. Consequently, it is  
401 very likely that the cerebellar memory at the beginning of the no-feedback blocks was stronger<sup>11</sup>, and  
402 the explicit contribution was less for this group compared to the BF-Maintain group<sup>7,16,35,45</sup>. This  
403 would therefore result in the slow drop in reach angle observed during early no-feedback trials due to  
404 gradual decay of the cerebellar memory<sup>38,43,46</sup>. Critically, both possibilities are not incompatible, and  
405 may well occur together.

406  
407 A notable feature of retention performance is that both BF- and VF-Remove groups show a residual  
408 bias of around 5° in their reach angle in the direction of the displacement. Participants in the Remove  
409 conditions were not aware of this upon asking them after the experiment. This has been reliably  
410 observed in studies using no-feedback blocks to assess retention<sup>47,48</sup> (but see<sup>43</sup>). Possible  
411 explanations include use-dependent plasticity-induced bias<sup>49,50</sup> or an implicit model-free  
412 reinforcement-based memory, although this study cannot provide any account toward one or the other.  
413 Note however that although the BF-Remove group expressed slightly more bias than its VF  
414 counterpart, this clearly did not reach statistical significance, meaning this cannot be explained by

415 feedback type alone. Regardless, the implicit and lasting nature of this phenomenon makes it a  
416 promising focus for future research with clinical applications.

417

418 Overall, our findings all point toward a central role of strategy-use during BF-induced behaviours. In  
419 line with this, 14/54 participants had to be removed from the BF groups in the feedback-instruction  
420 task (experiment 1) because of poor performance in the asymptote blocks (see methods), suggesting  
421 that structural learning is required to perform accurately<sup>42</sup>. This is again in line with the dip observed  
422 in the BF groups and the absence of dip in the (informed) SRT group. Our view is that implicit,  
423 model-free reinforcement takes a great amount of time and practice to form<sup>41,51</sup>, and usually arises  
424 from initially model-based performance in behavioural literature<sup>18,52</sup>, as illustrated by popular  
425 reinforcement models (e.g. DYNA<sup>53,54</sup>). Two interesting possibilities are that 200 trials of BF alone  
426 are not sufficient to result in a strong, habit-like enhancement of retention<sup>52</sup>, or that such behavioural  
427 consolidation must take place through sleep<sup>52,55</sup>. Future work is required to address these hypotheses.

428

429 In conclusion, this study provides further insight into the use of reinforcement during motor learning,  
430 and suggests that successful reinforcement learning is tightly coupled to development and expression  
431 of an explicit strategy. Future studies investigating reinforcement during visuomotor adaptation  
432 should therefore proceed with care in order to map which behaviour is the consequence of actual  
433 implicitly reinforced memories or more explicit, strategic control.

434

## 435 **Methods**

436

### 437 **Participants**

438 80 participants (20 males) aged 18-37 (M=20.9 years) and 30 participants (11 males) aged 18-34  
439 (M=22.1 years) were recruited for experiment one and two, respectively, and pseudo-randomly  
440 assigned to a group after providing written informed consent. All participants were enrolled at the  
441 University of Birmingham. They were remunerated either with course credits or money (£7.5/hour).  
442 They were free of psychological, cognitive, motor or auditory impairment and were right-handed. The  
443 study was approved by the local research ethics committee of the University of Birmingham and done  
444 in accordance to its guidelines.

445

### 446 **General procedure**

447 Participants were seated before a horizontal mirror reflecting a screen above (refresh rate 60 Hz) that  
448 displayed the workspace and their hand position (figure 1a), represented by a green cursor (diameter  
449 0.3 cm). Hand position was tracked by a sensor taped on the right hand index of each participant and  
450 connected to a Polhemus 3SPACE Fastrak tracking device (Colchester, Vermont U.S.A; sampling rate

451 120 Hz). Programs were run under MatLab (The Mathworks, Natwick, MA), with Psychophysics  
452 Toolbox 3<sup>56</sup>. Participants performed the reaching task on a flat surface under the mirror, with the  
453 reflection of the screen matching the surface plane. All movements were hidden from the participant's  
454 sight. When each trial starts, participants entered a white starting box (1 cm width) on the centre of  
455 the workspace with the cursor, which triggered target appearance. Targets (diameter 0.5 cm) were 8  
456 cm away from the starting position. Henceforth, the target position directly in front of the participant  
457 will be defined as the 0° position and other target positions will be expressed with this reference.  
458 Participants were instructed to perform a fast “swiping” movement through the target. Once they  
459 reached 8 cm away from the starting box, the cursor disappeared and a yellow dot (diameter 0.3 cm)  
460 indicated their end position. When returning to the starting box, a white circle displaying their radial  
461 distance appeared to help them get back into it.

462

### 463 **Task design**

#### 464 *Experiment 1: feedback-instruction.*

465 For each trial, participants reached to a target located 45° counter-clock wise (CCW). Participants first  
466 performed a baseline block (60 trials) with veridical cursor feedback, followed by a 75 trials  
467 adaptation block in which a 20° CCW displacement was applied (figure 1b). In the following 2 blocks  
468 (100 trials each), participants either experienced the same perturbation with only BF, or with BF and  
469 VF. BF consisted of a pleasant sound selected based on each participant's preference from a series of  
470 26 sounds before the task, unbeknownst of the final purpose. When participants' cursor reached less  
471 than 5° away from the centre of the target, the sound was played, indicating a hit; otherwise no sound  
472 was played, indicating a miss. For the BF group, no cursor feedback was provided, except for one  
473 “refresher” trial every 10 trials where VF was present. Participants in the VF group could see the  
474 cursor position at all times during the trial, along with the BF. Finally, participants went through 2 no-  
475 feedback blocks (100 trials each) with BF and VF completely removed. Before those blocks,  
476 participants were either told to “carry on” (“Maintain” group) or informed of the nature of the  
477 perturbation, and asked to stop using any strategy to account for it (“Remove” group). Therefore, we  
478 had four groups in a 2x2 factorial design (BF versus VF and Maintain versus Remove). Finally, if a  
479 trial's reaching movement duration was greater than 400 ms or less than 100 ms long, the starting box  
480 turned red or green, respectively, to ensure participants performed ballistic movements, and didn't  
481 make anticipatory movements. Participants who expressed a success rate inferior to 40% during  
482 asymptote blocks were excluded (BF-Remove N=6; BF-Maintain N=8). Although this exclusion rate  
483 was high, it was crucial to exclude participants who were unable to maintain asymptote performance  
484 in order to reliably measure retention.

485

#### 486 *Experiment 2: forced RT.*



487 In this experiment, participants were forced to perform the same reaching task at slow (SRT) or fast  
488 reaction times (FRT), the latter condition preventing strategy-use by enforcing movement initiation  
489 before any mental rotation can be applied to the motor command<sup>30,33</sup>. A third group (Gradual) also  
490 performed the task with no RT constraints.

491

492 In the SRT/FRT groups, for each trial, entering the starting box with the cursor triggered a series of  
493 five 100 ms long pure tones (1 kHz) every 500 ms (figure 1c). Before the fifth sound, a target  
494 appeared at one of four possible locations equally dispatched across a span of 360° (0-90-180-270°).  
495 Participants were instructed to initiate their movement exactly on the fifth tone (figure 1c). Targets  
496 appeared 1000 ms (SRT) or 200 ms (FRT) before the beginning of the fifth tone. Movement  
497 initiations shorter than 130 ms are likely anticipatory movements<sup>31</sup>, and explicit strategies start to be  
498 difficult to express under 300 ms<sup>30,32</sup>. Therefore, in both conditions, movements were successful if  
499 participants exited the starting box between 70 ms before the start of the fifth tone and the end of the  
500 fifth tone, that is, from 130 ms to 300 ms after target appearance in the FRT condition. If movements  
501 were initiated too early or too late, a message "too fast" or "too slow" was displayed and the cursor  
502 did not appear upon exiting the starting box. The trial was then reinitialised and a new target selected.  
503 Finally, if participants repeatedly missed movement initiation, making trial duration over 25 seconds,  
504 RT constraints were removed, to allow trial completion before cerebellar memory time-dependent  
505 decay<sup>43,46,57</sup>. Participants in the SRT and FRT groups were informed of the displacement and of the  
506 optimal strategy to counter it, to ensure that any effect was related to expression, rather than  
507 development of a strategy. They were also instructed to attempt using the optimal strategy as much as  
508 possible when sensible, but not at the expense of the secondary RT task, so as to preserve the pace of  
509 the experiment and prevent time-dependent memory decay.

510

511 To attain proficiency in the RT task, SRT and FRT participants performed a training block (pseudo-  
512 random order of VF and BF trials) of at least 96 trials, or until they could initiate movements on the  
513 fifth tone reliably (at the first attempt) at least for 75% of the previous 8 trials. All participants  
514 achieved this in 96 to 157 trials. Once this was achieved, participants first performed a 40 trials  
515 baseline (figure 1d), followed by introduction of a 20° CCW displacement for 260 trials. Participants  
516 then underwent a 200-trials long asymptote block with only BF (1 "refresher" trial every 10 trials).  
517 The BF consisted of a green tick or a red cross if participants hit or missed the target, respectively.  
518 Visual BF was used to prevent interference with the tones presented to manipulate RTs. The Gradual  
519 group underwent the same schedule, except that no tone or RT constraint were used, and the  
520 perturbation was introduced gradually from the 41<sup>st</sup> to the 240<sup>th</sup> trial of the first block (increment of  
521 0.4°/trial) occurring independently for each target. This ensured participants experienced as few large  
522 errors as possible to prevent awareness of the perturbation and therefore strategy-use. After the  
523 experiment, participants in the Gradual group were informed of the displacement, and subsequently

524 asked if they noticed it. If they answered positively, they were asked to estimate the size of the  
525 displacement.

526

### 527 **Data analysis**

528 All data and analysis code is available on our open science framework page ([osf.io/hrgzq](https://osf.io/hrgzq)). All  
529 analyses were performed in MatLab. We used Lilliefors test to assess whether data were parametric,  
530 and we compared groups using Kruskal-Wallis or Wilcoxon signed-rank tests when appropriate, as  
531 most data were non-parametric. Post-hoc tests were done using Tukey's procedure. As we analysed  
532 the data from experiment two twice (figure 3 and 4), success rates and reach angles during asymptote  
533 were Bonferroni-corrected with corrected p-values (multiplied by 2).

534

535 Learning rates were obtained by fitting an exponential function to adaptation block reach angle curves  
536 with a non-linear least-square method and maximum 1000 iterations (average  $R^2 = 0.86 \pm 0.14$  for  
537 feedback-instruction task and  $R^2 = 0.58 \pm 0.26$  for forced-RT task):

$$y = a \cdot e^{\beta x} + b$$

538

539 where  $y$  is the hand direction for trial  $x$ ,  $a$  is a scaling factor,  $b$  is the starting value and  $\beta$  is the  
540 learning rate. Reach angles were defined as angular error to target of the real hand position at the end  
541 of a movement. Trials were considered outliers and removed if movement duration was over 400 ms  
542 or less than 100 ms, end point reach angle was over  $40^\circ$  off target, and for the SRT and FRT groups in  
543 the forced-RT task, if failed initiation attempts continued for more than 25 sec. In total, outliers  
544 accounted for 3755 trials (8%) in the feedback-instruction task and 1013 trials (6%) in the forced-RT  
545 task.

546

547 Even though 4 targets were used during the forced-RT task, trials were reset and a new random target  
548 was selected every time participants failed to initiate movements on the 5<sup>th</sup> tone. Therefore, all  
549 possible target positions would not be represented for each epoch and analysis was done without using  
550 epochs.

551

552

553

554

555

556

557

558

## 559 Acknowledgements

560 We thank Raphael Schween for helpful discussions on interpretation of the data.

561 This work was supported by the European Research Council grant MotMotLearn 637488.

562

## 563 Additional information

564 The authors declare no competing financial interests.

565

## 566 Author contributions

567 O.C., P.J.H. and J.M.G. designed the experiments, O.C. implemented and ran the experiments, O.C.

568 and P.J.H. analysed the data, O.C., P.J.H. and J.M.G. interpreted the results, O.C. wrote the paper,

569 O.C., P.J.H. and J.M.G. approved the final version of the manuscript.

570

## 571 Supplementary figures

572

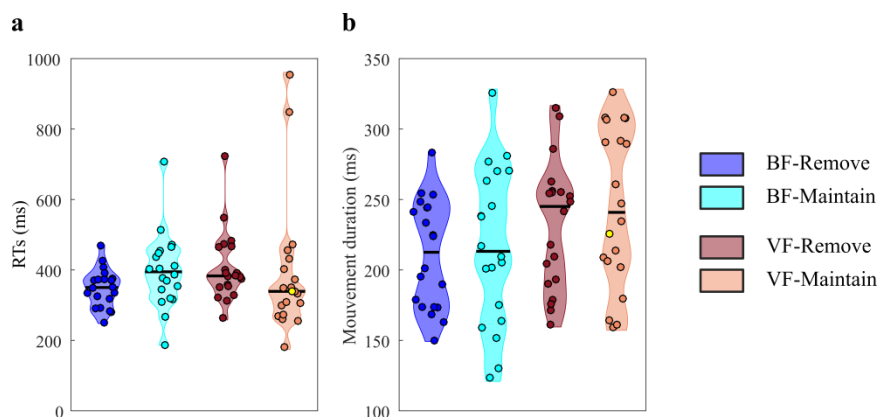

573

574

575 **Supplementary figure S1. Experiment 1: feedback-instruction.** (a) Average reaction times of  
576 participants during the asymptote phase. (b) Average movement duration of participants during  
577 the asymptote phase. Each dot represents one participant. The yellow dot represents the same participant  
578 across all plots (the same participant as figure 2). Black lines are group medians and the shaded areas  
579 indicate distribution of individual values.

580

581

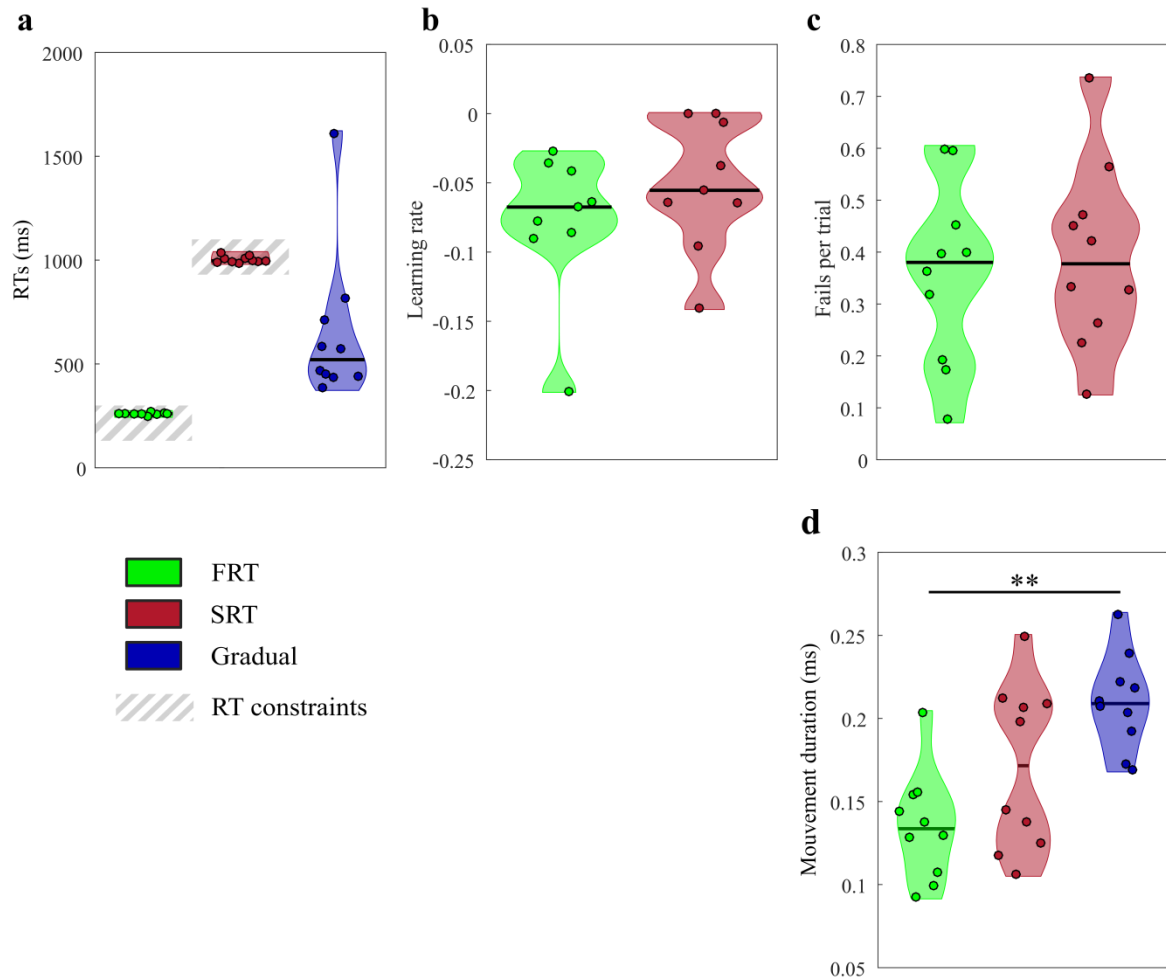

582

583 **Supplementary figure S2. Experiment 2: forced RT.** (a) Average reaction times of participants  
584 throughout the task. (b) Average number of failures per trial to initiate movements within the  
585 constrained timeframe throughout the task. (c) Average movement duration of participants throughout  
586 the task. (d) Learning rates during the adaptation phase. Each dot represents one participant. Black  
587 lines are group medians and the shaded areas indicate distribution of individual values. SRT: short  
588 reaction time; FRT: fast reaction time. \*\* p<0.01.

589

590

591

592

593

594

595

596

597

598

599

## 600 References

- 601 1. Tseng, Y. -w., Diedrichsen, J., Krakauer, J. W., Shadmehr, R. & Bastian, A. J. Sensory Prediction  
602 Errors Drive Cerebellum-Dependent Adaptation of Reaching. *J. Neurophysiol.* **98**, 54–62 (2007).
- 603 2. Krakauer, J. W. Motor Learning and Consolidation: The Case of Visuomotor Rotation. in  
604 *Progress in Motor Control* (ed. Sternad, D.) **629**, 405–421 (Springer US, 2009).
- 605 3. Wolpert, D. M. & Miall, R. C. Forward Models for Physiological Motor Control. *Neural Netw.*  
606 *Off. J. Int. Neural Netw. Soc.* **9**, 1265–1279 (1996).
- 607 4. Wolpert, D. M., Miall, R. C. & Kawato, M. Internal models in the cerebellum. *Trends Cogn. Sci.*  
608 **2**, 338–347 (1998).
- 609 5. Mazzoni, P. & Krakauer, J. W. An Implicit Plan Overrides an Explicit Strategy during  
610 Visuomotor Adaptation. *J. Neurosci.* **26**, 3642–3645 (2006).
- 611 6. Shadmehr, R. & Krakauer, J. W. A computational neuroanatomy for motor control. *Exp. Brain*  
612 *Res.* **185**, 359–381 (2008).
- 613 7. Taylor, J. A., Krakauer, J. W. & Ivry, R. B. Explicit and Implicit Contributions to Learning in a  
614 Sensorimotor Adaptation Task. *J. Neurosci.* **34**, 3023–3032 (2014).
- 615 8. Taylor, J. A. & Ivry, R. B. Flexible Cognitive Strategies during Motor Learning. *PLoS Comput.*  
616 *Biol.* **7**, e1001096 (2011).
- 617 9. Taylor, J. A. & Ivry, R. B. Cerebellar and Prefrontal Cortex Contributions to Adaptation,  
618 Strategies, and Reinforcement Learning. in *Progress in Brain Research* **210**, 217–253 (Elsevier,  
619 2014).
- 620 10. Huang, V. S., Haith, A., Mazzoni, P. & Krakauer, J. W. Rethinking Motor Learning and Savings  
621 in Adaptation Paradigms: Model-Free Memory for Successful Actions Combines with Internal  
622 Models. *Neuron* **70**, 787–801 (2011).
- 623 11. Izawa, J. & Shadmehr, R. Learning from Sensory and Reward Prediction Errors during Motor  
624 Adaptation. *PLoS Comput. Biol.* **7**, e1002012 (2011).
- 625 12. Shmuelof, L. *et al.* Overcoming Motor ‘Forgetting’ Through Reinforcement Of Learned Actions.  
626 *J. Neurosci.* **32**, 14617–14621a (2012).
- 627 13. Leow, L.-A., de Rugy, A., Marinovic, W., Riek, S. & Carroll, T. J. Savings for visuomotor  
628 adaptation require prior history of error, not prior repetition of successful actions. *J. Neurophysiol.*  
629 **116**, 1603–1614 (2016).
- 630 14. Malfait, N. Is Interlimb Transfer of Force-Field Adaptation a Cognitive Response to the Sudden  
631 Introduction of Load? *J. Neurosci.* **24**, 8084–8089 (2004).
- 632 15. Orban de Xivry, J.-J. & Lefèvre, P. Formation of model-free motor memories during motor  
633 adaptation depends on perturbation schedule. *J. Neurophysiol.* **113**, 2733–2741 (2015).
- 634 16. Huberdeau, D. M., Krakauer, J. W. & Haith, A. M. Dual-process decomposition in human  
635 sensorimotor adaptation. *Curr. Opin. Neurobiol.* **33**, 71–77 (2015).

- 636 17. Therrien, A. S., Wolpert, D. M. & Bastian, A. J. Effective reinforcement learning following  
637 cerebellar damage requires a balance between exploration and motor noise. *Brain* **139**, 101–114  
638 (2016).
- 639 18. Daw, N. D., Gershman, S. J., Seymour, B., Dayan, P. & Dolan, R. J. Model-Based Influences on  
640 Humans' Choices and Striatal Prediction Errors. *Neuron* **69**, 1204–1215 (2011).
- 641 19. Sun, R., Slusarz, P. & Terry, C. The Interaction of the Explicit and the Implicit in Skill Learning:  
642 A Dual-Process Approach. *Psychol. Rev.* **112**, 159–192 (2005).
- 643 20. Huys, Q. J. M. *et al.* Bonsai Trees in Your Head: How the Pavlovian System Sculpts Goal-  
644 Directed Choices by Pruning Decision Trees. *PLoS Comput. Biol.* **8**, e1002410 (2012).
- 645 21. Gläscher, J., Daw, N., Dayan, P. & O'Doherty, J. P. States versus Rewards: Dissociable Neural  
646 Prediction Error Signals Underlying Model-Based and Model-Free Reinforcement Learning.  
647 *Neuron* **66**, 585–595 (2010).
- 648 22. Hwang, E. J., Smith, M. A. & Shadmehr, R. Dissociable effects of the implicit and explicit  
649 memory systems on learning control of reaching. *Exp. Brain Res.* **173**, 425–437 (2006).
- 650 23. Haith, A. M. & Krakauer, J. W. Model-Based and Model-Free Mechanisms of Human Motor  
651 Learning. in *Progress in Motor Control* (eds. Richardson, M. J., Riley, M. A. & Shockley, K.)  
652 **782**, 1–21 (Springer New York, 2013).
- 653 24. Daw, N. D., Niv, Y. & Dayan, P. Uncertainty-based competition between prefrontal and  
654 dorsolateral striatal systems for behavioral control. *Nat. Neurosci.* **8**, 1704–1711 (2005).
- 655 25. Anguera, J. A., Reuter-Lorenz, P. A., Willingham, D. T. & Seidler, R. D. Contributions of spatial  
656 working memory to visuomotor learning. *J. Cogn. Neurosci.* **22**, 1917–1930 (2010).
- 657 26. Christou, A. I., Miall, R. C., McNab, F. & Galea, J. M. Individual differences in explicit and  
658 implicit visuomotor learning and working memory capacity. *Sci. Rep.* **6**, (2016).
- 659 27. Otto, A. R., Gershman, S. J., Markman, A. B. & Daw, N. D. The curse of planning: dissecting  
660 multiple reinforcement-learning systems by taxing the central executive. *Psychol. Sci.* **24**, 751–  
661 761 (2013).
- 662 28. Otto, A. R., Skatova, A., Madlon-Kay, S. & Daw, N. D. Cognitive Control Predicts Use of  
663 Model-based Reinforcement Learning. *J. Cogn. Neurosci.* **27**, 319–333 (2015).
- 664 29. Simon, D. A. & Daw, N. D. Neural Correlates of Forward Planning in a Spatial Decision Task in  
665 Humans. *J. Neurosci.* **31**, 5526–5539 (2011).
- 666 30. Haith, A. M., Huberdeau, D. M. & Krakauer, J. W. The Influence of Movement Preparation Time  
667 on the Expression of Visuomotor Learning and Savings. *J. Neurosci.* **35**, 5109–5117 (2015).
- 668 31. Haith, A. M., Pakpoor, J. & Krakauer, J. W. Independence of Movement Preparation and  
669 Movement Initiation. *J. Neurosci.* **36**, 3007–3015 (2016).
- 670 32. Leow, L.-A., Gunn, R., Marinovic, W. & Carroll, T. J. Estimating the implicit component of  
671 visuomotor rotation learning by constraining movement preparation time. *J. Neurophysiol.*  
672 jn.00834.2016 (2017). doi:10.1152/jn.00834.2016

- 673 33. Fernandez-Ruiz, J., Wong, W., Armstrong, I. T. & Flanagan, J. R. Relation between reaction time  
674 and reach errors during visuomotor adaptation. *Behav. Brain Res.* **219**, 8–14 (2011).
- 675 34. Morehead, J. R., Qasim, S. E., Crossley, M. J. & Ivry, R. Savings upon Re-Aiming in Visuomotor  
676 Adaptation. *J. Neurosci.* **35**, 14386–14396 (2015).
- 677 35. Bond, K. M. & Taylor, J. A. Flexible explicit but rigid implicit learning in a visuomotor  
678 adaptation task. *J. Neurophysiol.* **113**, 3836–3849 (2015).
- 679 36. Werner, S. *et al.* Awareness of Sensorimotor Adaptation to Visual Rotations of Different Size.  
680 *PLOS ONE* **10**, e0123321 (2015).
- 681 37. Saijo, N. & Gomi, H. Multiple Motor Learning Strategies in Visuomotor Rotation. *PLoS ONE* **5**,  
682 e9399 (2010).
- 683 38. Brennan, A. E. & Smith, M. A. The Decay of Motor Memories Is Independent of Context Change  
684 Detection. *PLOS Comput. Biol.* **11**, e1004278 (2015).
- 685 39. Pekny, S. E., Criscimagna-Hemminger, S. E. & Shadmehr, R. Protection and Expression of  
686 Human Motor Memories. *J. Neurosci.* **31**, 13829–13839 (2011).
- 687 40. Smith, M. A., Ghazizadeh, A. & Shadmehr, R. Interacting Adaptive Processes with Different  
688 Timescales Underlie Short-Term Motor Learning. *PLoS Biol.* **4**, e179 (2006).
- 689 41. Sutton, R. S. & Barto, A. *Reinforcement Learning: An Introduction*. (A Bradford Book, 1998).
- 690 42. Manley, H., Dayan, P. & Diedrichsen, J. When Money Is Not Enough: Awareness, Success, and  
691 Variability in Motor Learning. *PLoS ONE* **9**, e86580 (2014).
- 692 43. Kitago, T., Ryan, S. L., Mazzoni, P., Krakauer, J. W. & Haith, A. M. Unlearning versus savings  
693 in visuomotor adaptation: comparing effects of washout, passage of time, and removal of errors  
694 on motor memory. *Front. Hum. Neurosci.* **7**, (2013).
- 695 44. Morehead, J. R., Taylor, J. A., Parvin, D. & Ivry, R. B. Characteristics of Implicit Sensorimotor  
696 Adaptation Revealed by Task-irrelevant Clamped Feedback. *J. Cogn. Neurosci.* 1–14 (2017).  
697 doi:10.1162/jocn\_a\_01108
- 698 45. McDougle, S. D., Bond, K. M. & Taylor, J. A. Explicit and Implicit Processes Constitute the Fast  
699 and Slow Processes of Sensorimotor Learning. *J. Neurosci.* **35**, 9568–9579 (2015).
- 700 46. Yang, Y. & Lisberger, S. G. Role of Plasticity at Different Sites across the Time Course of  
701 Cerebellar Motor Learning. *J. Neurosci.* **34**, 7077–7090 (2014).
- 702 47. Galea, J. M., Vazquez, A., Pasricha, N., Orban de Xivry, J.-J. & Celnik, P. Dissociating the Roles  
703 of the Cerebellum and Motor Cortex during Adaptive Learning: The Motor Cortex Retains What  
704 the Cerebellum Learns. *Cereb. Cortex* **21**, 1761–1770 (2011).
- 705 48. Galea, J. M., Mallia, E., Rothwell, J. & Diedrichsen, J. The dissociable effects of punishment and  
706 reward on motor learning. *Nat. Neurosci.* **18**, 597–602 (2015).
- 707 49. Bütefisch, C. M. *et al.* Mechanisms of use-dependent plasticity in the human motor cortex. *Proc.*  
708 *Natl. Acad. Sci.* **97**, 3661–3665 (2000).

- 709 50. Classen, J., Liepert, J., Wise, S. P., Hallett, M. & Cohen, L. G. Rapid plasticity of human cortical  
710 movement representation induced by practice. *J. Neurophysiol.* **79**, 1117–1123 (1998).
- 711 51. Wunderlich, K., Dayan, P. & Dolan, R. J. Mapping value based planning and extensively trained  
712 choice in the human brain. *Nat. Neurosci.* **15**, 786–791 (2012).
- 713 52. Tricomi, E., Balleine, B. W. & O’Doherty, J. P. A specific role for posterior dorsolateral striatum  
714 in human habit learning. *Eur. J. Neurosci.* **29**, 2225–2232 (2009).
- 715 53. Sutton, R. S., Szepesvári, C., Geramifard, A. & Bowling, M. Dyna-style planning with linear  
716 function approximation and prioritized sweeping. in *Proceedings of the 24th Conference on*  
717 *Uncertainty in Artificial Intelligence* (2008).
- 718 54. Sutton, R. S. Integrated Architectures for Learning, Planning, and Reacting Based on  
719 Approximating Dynamic Programming. in *In Proceedings of the Seventh International*  
720 *Conference on Machine Learning* 216–224 (Morgan Kaufmann, 1990).
- 721 55. Reis, J. *et al.* Noninvasive cortical stimulation enhances motor skill acquisition over multiple  
722 days through an effect on consolidation. *Proc. Natl. Acad. Sci.* **106**, 1590–1595 (2009).
- 723 56. Brainard, D. H. The Psychophysics Toolbox. *Spat. Vis.* **10**, 433–436 (1997).
- 724 57. Kim, S., Oh, Y. & Schweighofer, N. Between-Trial Forgetting Due to Interference and Time in  
725 Motor Adaptation. *PLOS ONE* **10**, e0142963 (2015).
- 726
